# Supplementary material
Source: Springer Nature journal article supplement (https://www.springermedizin.de/resource/supplementary/13550_2011_13_MOESM5_ESM.pdf/9687402)

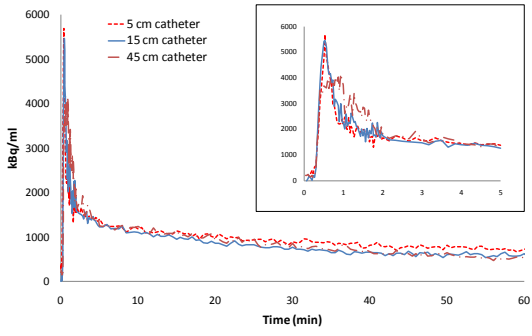

(a)

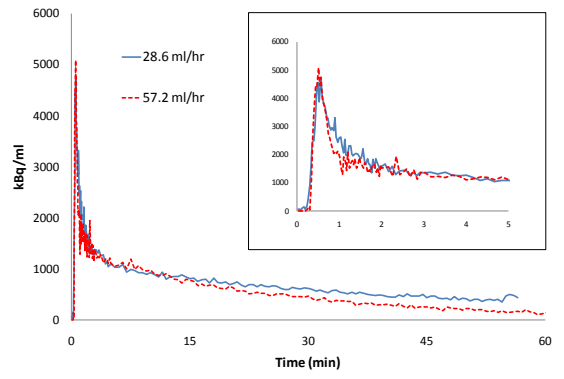

(b-i)

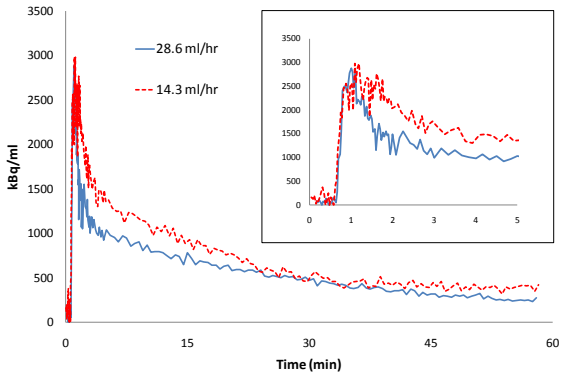

(b-ii)

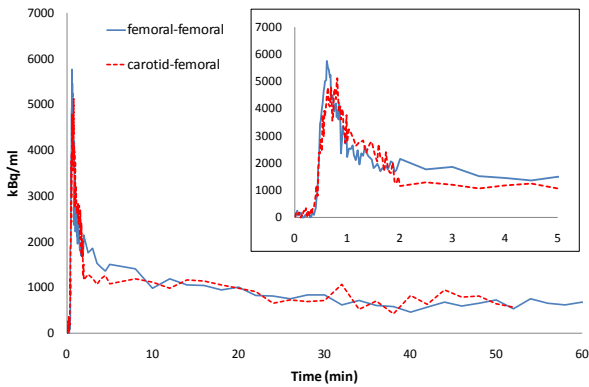

(c)

Supplement: MOESM5 [file 9687402]
